# Supplementary material for: Disodium Cantharidinate and Vitamin B6 Injection Adjunct with Platinum-Based Chemotherapy for the Treatment of Advanced Non-Small-Cell Lung Cancer: A Meta-Analysis
Source: Hindawi journal article supplement (doi:10.1155/2019/9386273), 2019-03-12
Supplement: f1 [file 9386273.f1.pdf]

## Supplementary Materials

**Table S1:** Criteria used to assess methodological quality\*

|                                     | Score                               |                                     |                              |
|-------------------------------------|-------------------------------------|-------------------------------------|------------------------------|
|                                     | 0                                   | 1                                   | 2                            |
| Randomization                       | ...                                 | Not concealed or not sure           | Concealed randomization      |
| Blinding                            | Not blinded                         | ...                                 | Adjudicators blinded         |
| Analysis                            | Other                               | ...                                 | Intention to treat           |
| Patient selection                   | Selected patients or unable to tell | Consecutive eligible patients       | ...                          |
| Comparability of groups at baseline | No or not sure                      | Yes                                 | ...                          |
| Extent of follow-up                 | <100%                               | 100%                                | ...                          |
| Treatment protocol                  | Poorly described                    | Reproducibly described              | ...                          |
| Cointerventions                     | Not described                       | Described but not equal or not sure | Well described and all equal |
| Outcomes                            | Not described                       | Partially described                 | Objectively defined          |

\*The first 3 questions and the last 2 questions had possible scores of 0, 1, or 2. The middle 3 questions had possible scores of 0 or 1. The highest possible score was 14. Ellipses indicate data not applicable.

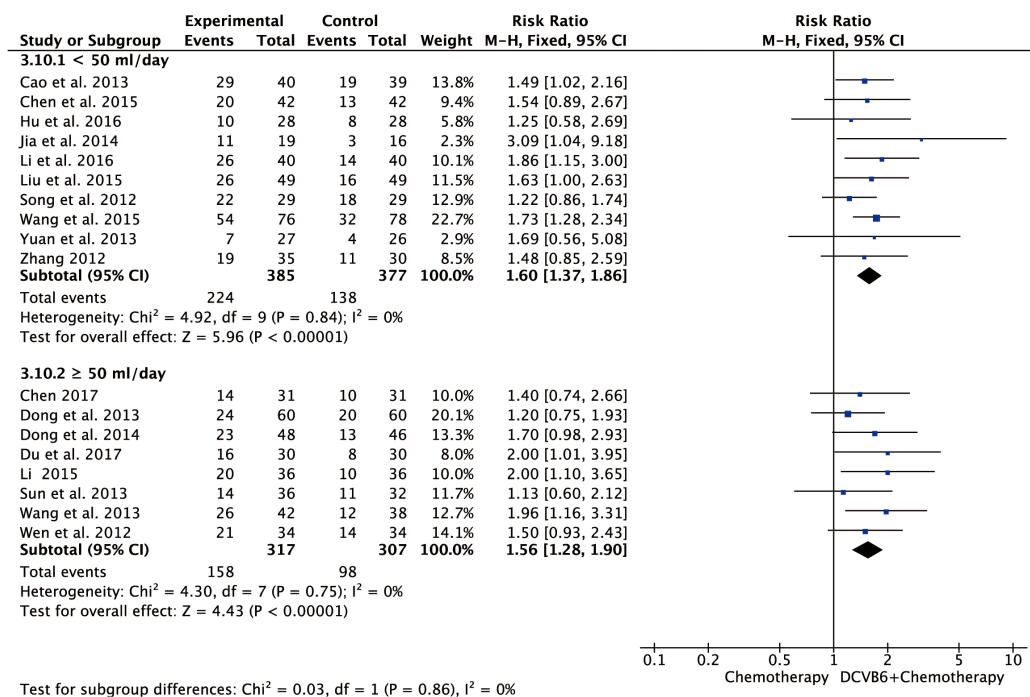

**Figure S1:** Subgroup analysis of ORR for different doses of DCVB6 injection

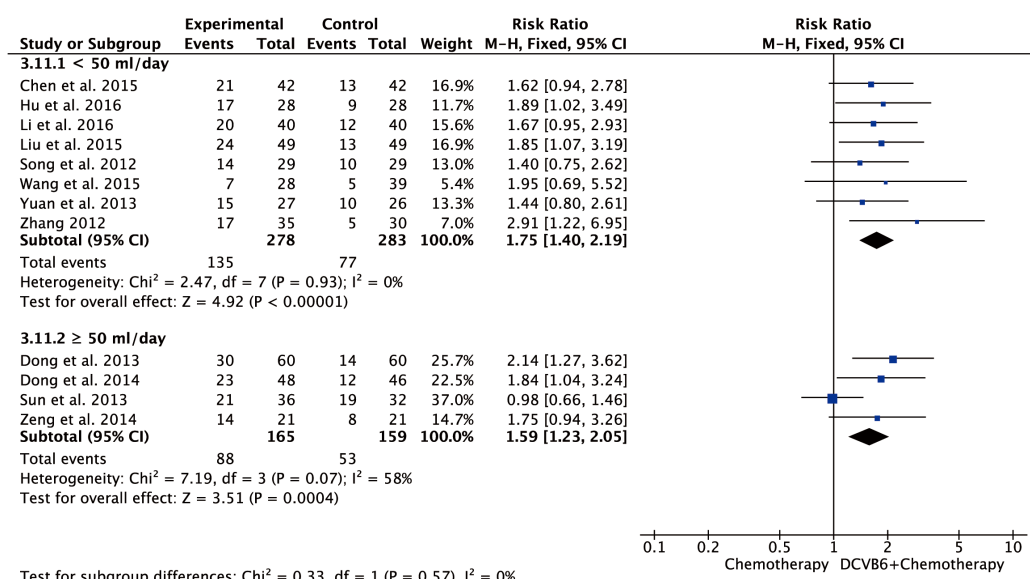

**Figure S2:** Subgroup analysis of KPS for different doses of DCVB6 injection

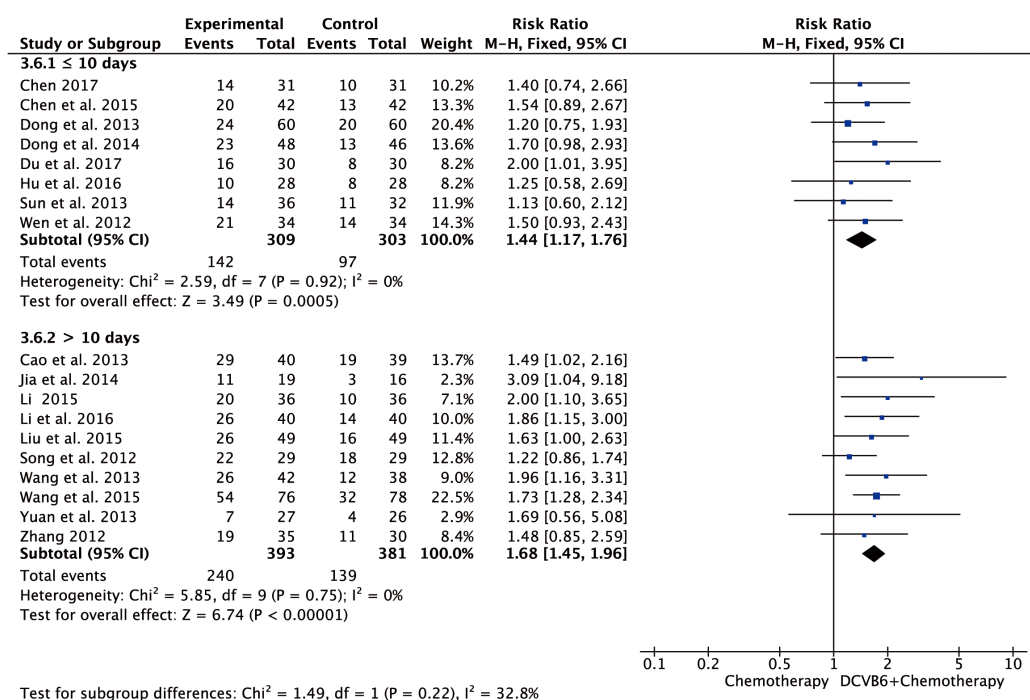

**Figure S3:** Subgroup analysis of ORR for different durations of DCVB6 injection

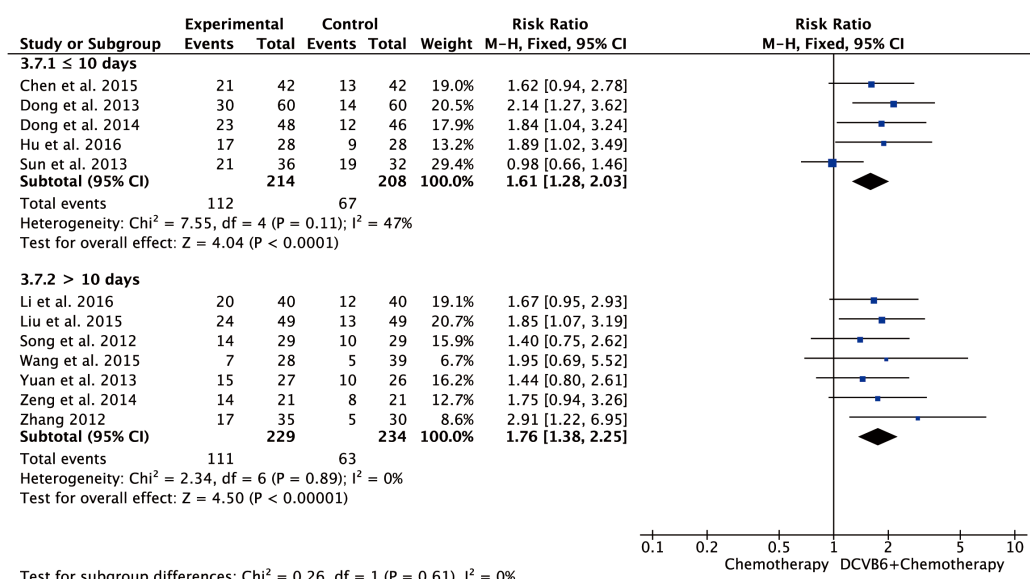

**Figure S4:** Subgroup analysis of KPS for different durations of DCVB6 injection

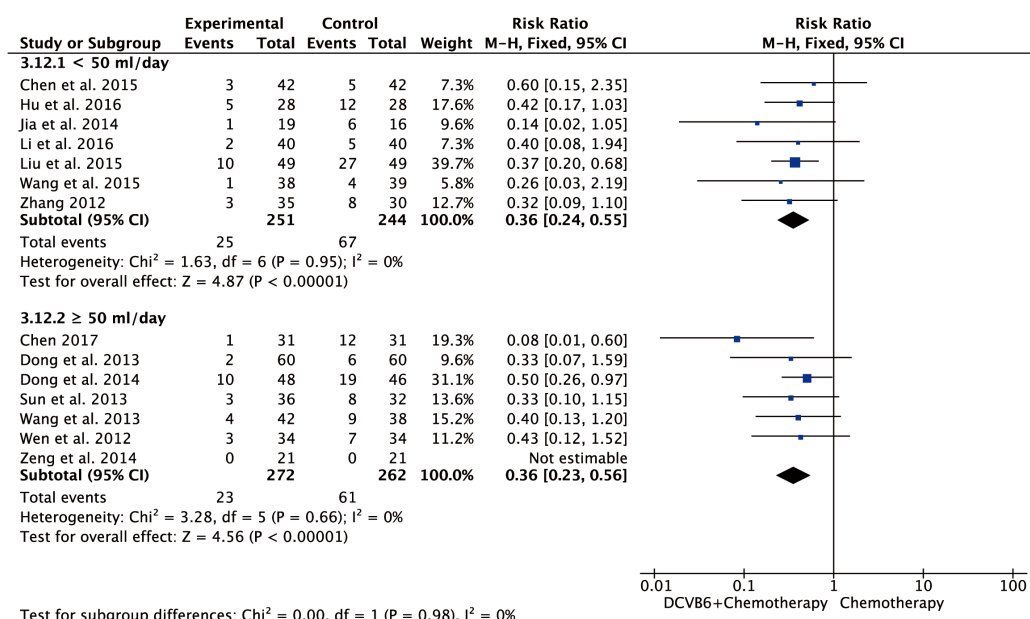

**Figure S5:** Subgroup analysis of WBC toxicity for different doses of DCVB6 injection

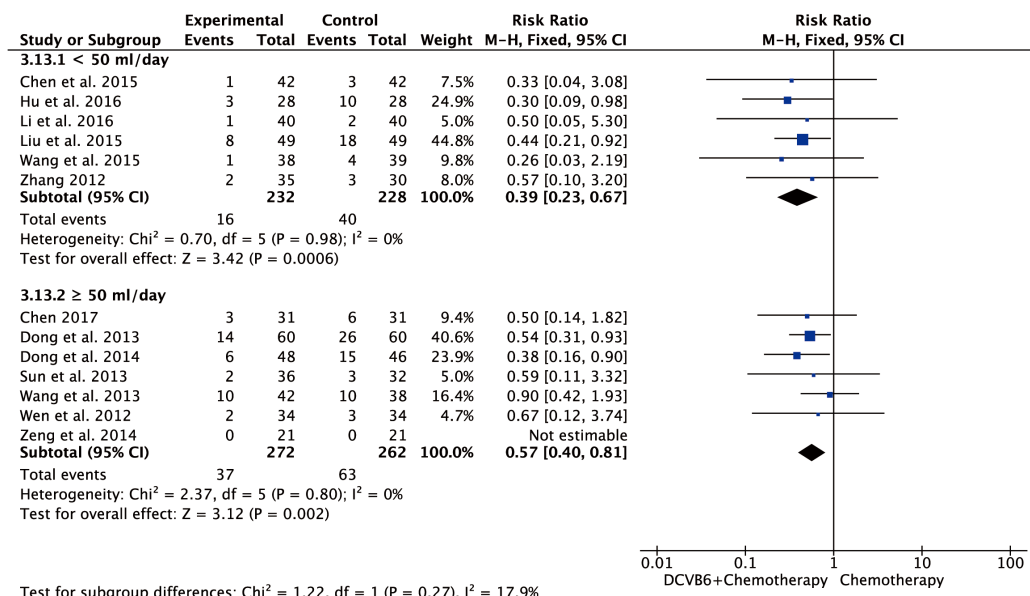

**Figure S6:** Subgroup analysis of vomiting for different doses of DCVB6 injection

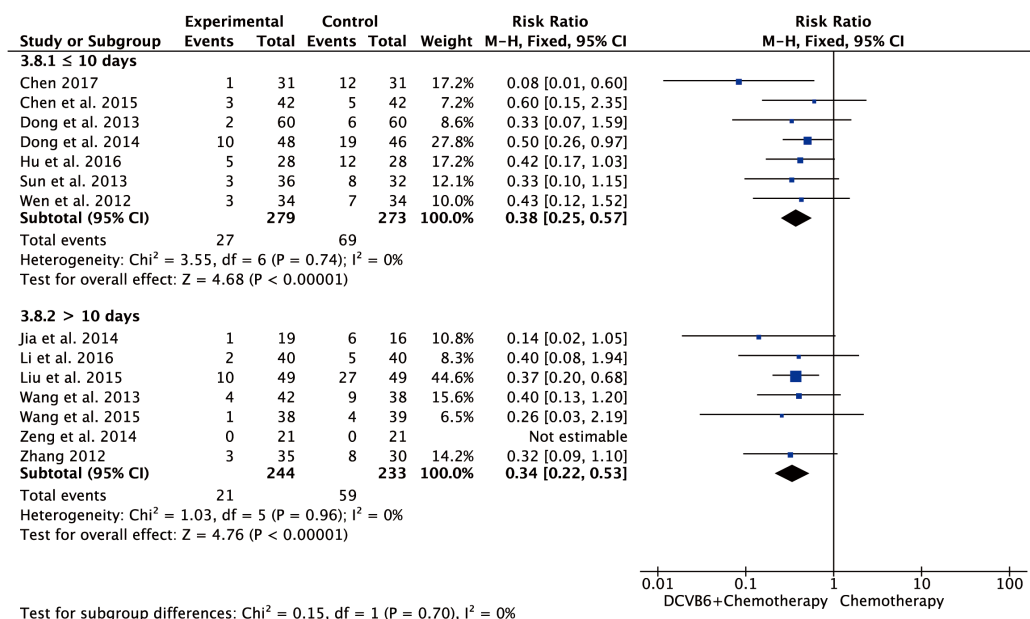

**Figure S7:** Subgroup analysis of WBC toxicity for different durations of DCVB6 injection

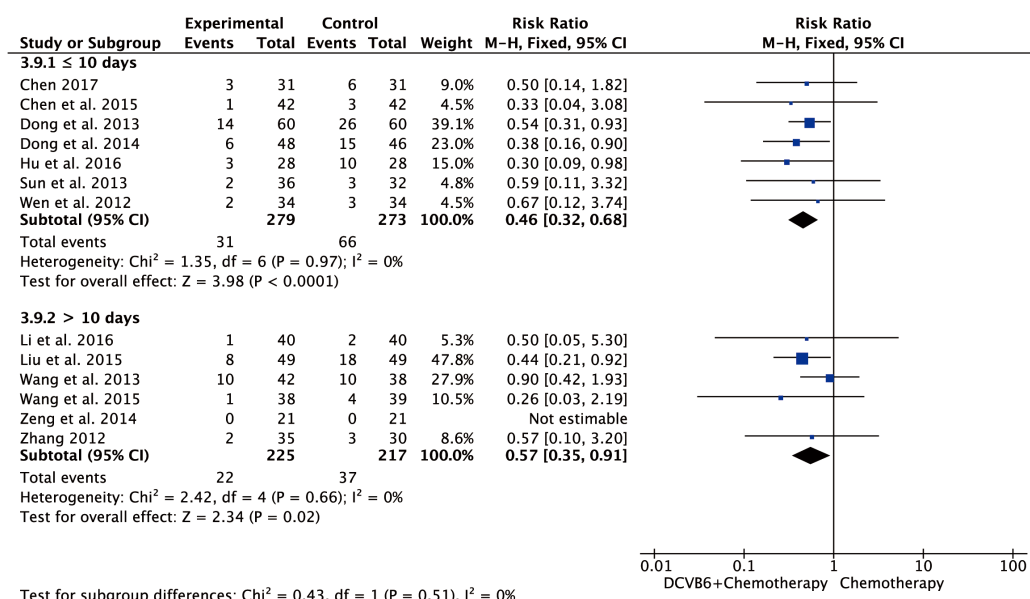

**Figure S8:** Subgroup analysis of vomiting for different durations of DCVB6 injection
